# Supplementary material
Source: PubMed Central journal article supplement (PMC6591073)
Supplement: NIHMS1011913-supplement-Supp_figS1-2.pdf [file NIHMS1011913-supplement-Supp_figS1-2.pdf]

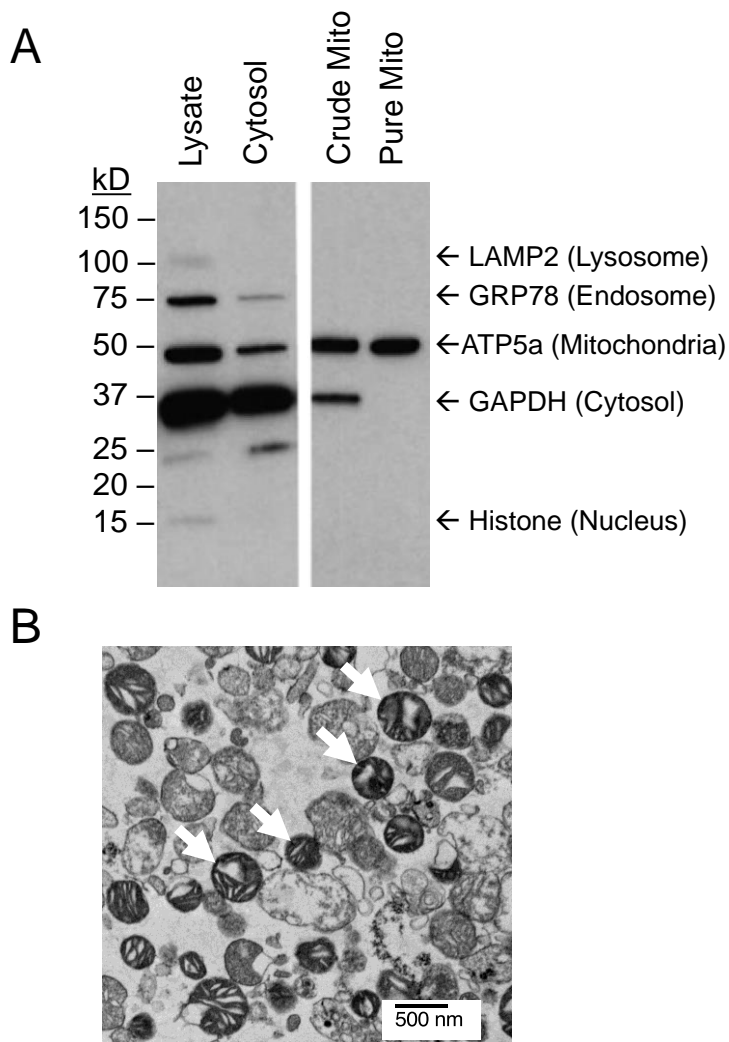

**Figure S1. Verification of purified mitochondria.** A) Western blot analysis of cell lysate, cytosol, crude mitochondria (Crude Mito) and affinity-purified mitochondria (Pure Mito) were analyzed by SDS-PAGE. Blots were simultaneously probed with a cocktail of rabbit monoclonal antibodies: anti-LAMP2 (lysosome marker), anti-GRP78 (endosome marker), anti-ATP5a (mitochondria marker), anti-GAPDH (cytosol marker), and anti-histone H3 (nuclear marker). B) Scanning electron microscopy analysis of purified mitochondria. White arrows point at examples of mitochondria.

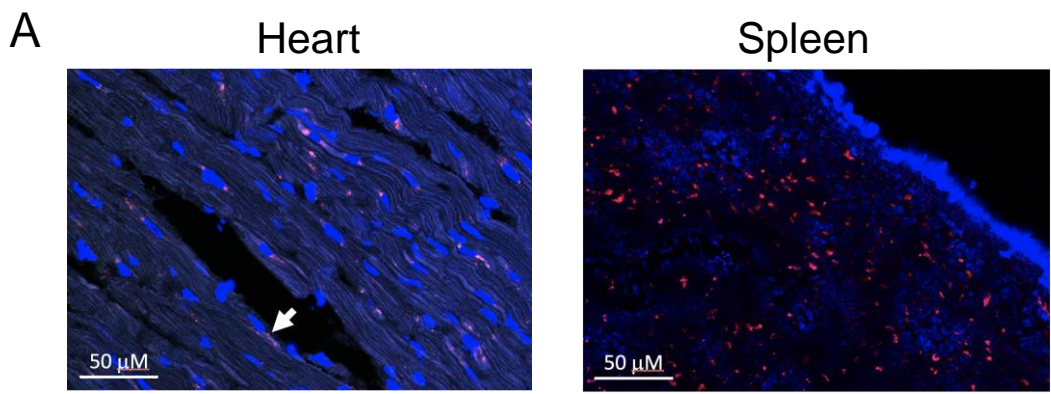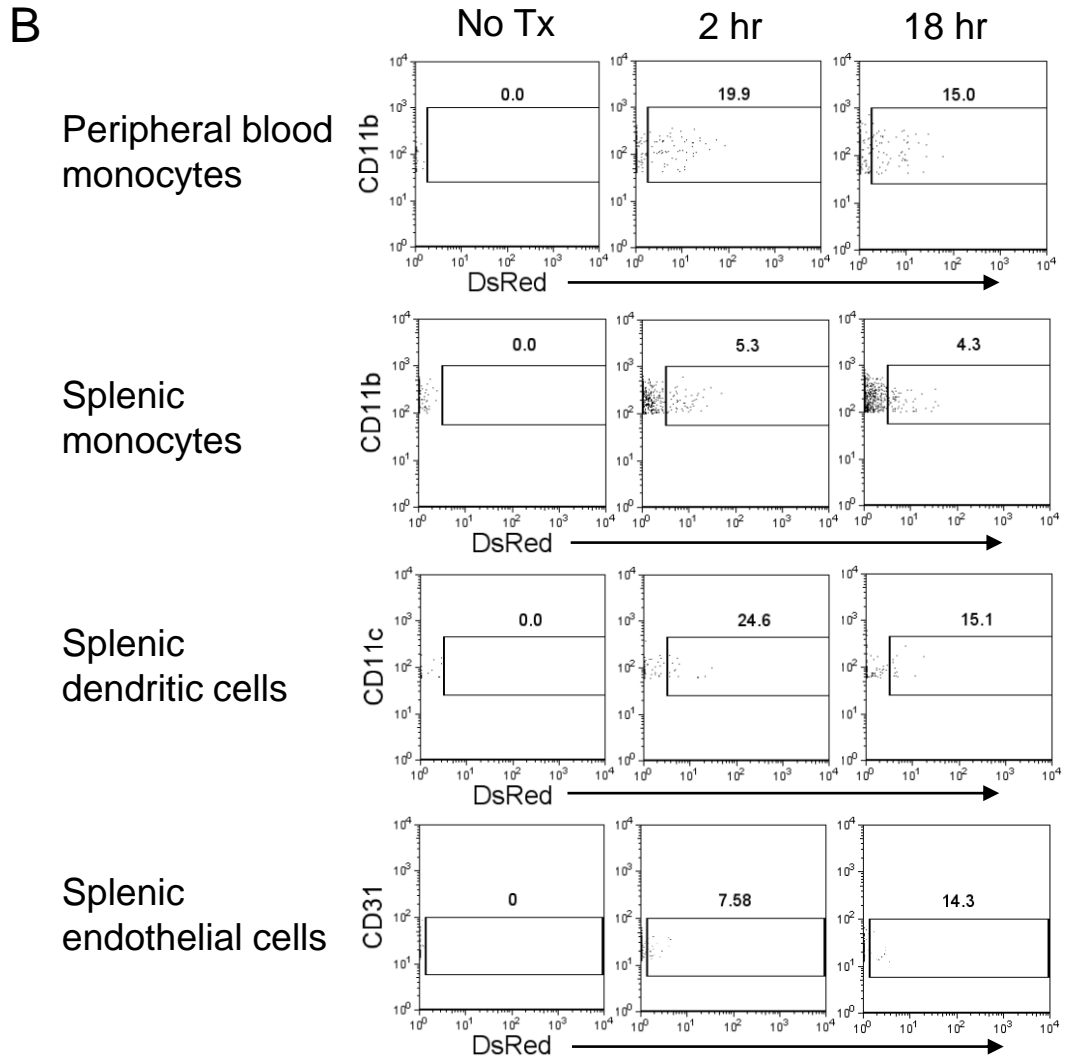

**Figure S2. Localization of intravenously injected mitochondria.** 300 mg of DsRed-labeled mitochondria were injected into healthy mice and the blood, spleen and heart were harvested at 2 hr or 18 hr. Frozen tissue sections (5 mM) were stained with DAPI nuclear stain and examined by confocal microscopy. A) Images of heart and spleen tissue. White arrow indicates a uptake of mitochondria by a potential endothelial cell. B) FACS analysis for DsRed uptake by peripheral blood monocytes (CD11b<sup>+</sup>, Ly6G<sup>neg</sup>), splenic monocytes (CD11b<sup>+</sup>, CD11c<sup>neg</sup>, Ly6G<sup>neg</sup>), splenic dendritic cells (CD11c<sup>+</sup>, CD11b<sup>+</sup>, Ly6G<sup>neg</sup>), and splenic endothelial cells (CD31<sup>+</sup>, CD45<sup>neg</sup>).
